# Supplementary material
Source: PubMed Central journal article supplement (PMC5832715)
Supplement: rspb20180004supp4.pdf [file rspb20180004supp4.pdf]

Table S1: Sexual phenotypic values, SI phenotype, and estimate of fruit production of the *F. excelsior* individual genotypes originating from Normandy (France) and present in the collection located at the INRA experimental nursery in Orleans (France).

| Individual genotype (IG) | Geographic origin of IG     | Number of ramets [1] | Number of times an IG was typed for sex [1] | Mean value of sexual phenotype | Standard deviation | SI phenotype G1/G2 | Estimate of fruit production in 2015 |
|--------------------------|-----------------------------|----------------------|---------------------------------------------|--------------------------------|--------------------|--------------------|--------------------------------------|
| Orleans_03               | N 49°20'05.26; E 0°11'00.76 | 25                   | 144                                         | 1.055                          | 0.228              | G2                 | 0                                    |
| Orleans_27               | N 49°25'03.06; E 1°19'04.76 | 17                   | 91                                          | 1.066                          | 0.250              | G2                 | 0                                    |
| Orleans_26               | N 49°25'03.06; E 1°19'04.76 | 17                   | 98                                          | 1.091                          | 0.380              | G2                 | 0                                    |
| Orleans_40               | N 48°46'05.36; E 0°39'02.76 | 1                    | 7                                           | 1.143                          | 0.378              | G2                 | 0                                    |
| Orleans_02               | N 49°20'05.26; E 0°11'00.76 | 14                   | 79                                          | 1.197                          | 0.400              | G2                 | 0                                    |
| Orleans_21               | N 49°39'01.66; E 1°37'00.16 | 10                   | 76                                          | 1.355                          | 0.482              | G2                 | 0                                    |
| Orleans_14               | N 49°08'05.46; E 0°47'03.66 | 4                    | 19                                          | 1.368                          | 0.496              | G2                 | 1*                                   |
| Orleans_31               | N 49°41'04.46; E 0°51'04.36 | 11                   | 104                                         | 1.387                          | 0.517              | G2                 | 0                                    |
| Orleans_39               | N 49°40'03.46; E 1°25'03.96 | 8                    | 56                                          | 1.389                          | 0.526              | G2                 | 0                                    |
| Orleans_38               | N 49°39'05.76; E 1°27'04.96 | 9                    | 60                                          | 1.433                          | 0.563              | G2                 | 0                                    |
| Orleans_18               | N 49°39'01.66; E 1°37'00.16 | 4                    | 17                                          | 1.471                          | 0.515              | G2                 | 1**                                  |
| Orleans_10               | N 49°15'00.56; E 0°58'00.06 | 11                   | 70                                          | 1.507                          | 0.504              | G2                 | 0                                    |
| Orleans_08               | N 49°16'04.56; E 0°51'00.66 | 10                   | 66                                          | 1.727                          | 0.755              | G2                 | 0                                    |
| Orleans_42               | N 48°59'00.56; E 0°28'02.36 | 8                    | 45                                          | 1.822                          | 0.806              | G2                 | 1*                                   |
| Orleans_35               | N 49°45'05.46; E 1°22'05.06 | 9                    | 58                                          | 2.534                          | 0.821              | G2                 | 0                                    |
| Orleans_06               | N 49°20'05.26; E 0°11'00.76 | 6                    | 38                                          | 3.974                          | 0.3667             | G1                 | 4                                    |
| Orleans_32               | N 49°44'02.96; E 0°58'01.86 | 10                   | 44                                          | 4.000                          | 0.374              | G1                 | 4                                    |
| Orleans_34               | N 49°45'05.46; E 1°22'05.06 | 13                   | 90                                          | 4.099                          | 0.335              | G1                 | 2                                    |
| Orleans_46               | N 49°45'00.66; E 1°33'00.46 | 13                   | 79                                          | 4.304                          | 0.704              | G1                 | 4                                    |
| Orleans_45               | N 49°08'05.46; E 0°47'03.66 | 18                   | 76                                          | 4.395                          | 0.713              | G1                 | 5                                    |
| Orleans_07               | N 49°20'05.26; E 0°11'00.76 | 11                   | 65                                          | 4.400                          | 0.725              | G1                 | 3                                    |
| Orleans_33               | N 49°40'03.46; E 1°25'03.96 | 15                   | 62                                          | 4.419                          | 0.714              | G1                 | 5                                    |
| Orleans_15               | N 49°08'05.46; E 0°47'03.66 | 2                    | 3                                           | 4.667                          | 1.155              | G1                 | 2                                    |
| Orleans_41               | N 48°46'05.36; E 0°39'02.76 | 15                   | 81                                          | 4.793                          | 0.857              | G1                 | 4                                    |
| Orleans_16               | N 49°08'05.46; E 0°47'03.66 | 17                   | 53                                          | 5.000                          | 0.855              | G1                 | 2                                    |
| Orleans_44               | N 48°46'05.36; E 0°39'02.76 | 6                    | 26                                          | 5.346                          | 0.892              | G1                 | 4                                    |
| Orleans_11               | N 49°15'00.56; E 0°58'00.06 | 17                   | 107                                         | 5.897                          | 0.857              | G1                 | 2                                    |

A collection of *F. excelsior* genotypes selected in natural stands in Normandy (France) was used in the current study. Several ramets of each genotypes present in the seed orchard located in Alençon (France) were studied over several years to score the proportion of male, hermaphrodite, and female flowers in inflorescences [1] producing a substantial number of sexual phenotype scores for each genotype and providing an accurate mean value of the sexual phenotype. Two ramets of 27 genotypes transferred to Orleans were still present and flowering in 2015. They have been phenotyped for SI and fruiting intensity. The ramets of each genotype were scored in Alençon for sexual phenotype each year (when flowering) between 1999 and 2005, and again in 2008. This repeated phenotype scoring was performed independently for each tree using a seven-level classification: 1, inflorescences with male flowers only; 2, inflorescences with male flowers and less than 50% of hermaphrodite flowers; 3, inflorescences with male flowers and more than 50% of hermaphrodite flowers; 4, inflorescences with hermaphrodite flowers only; 5, inflorescences with hermaphrodite flowers and less than 50% of female flowers; 6, inflorescences with hermaphrodite flowers and more than 50% of female flowers; 7, inflorescences with female flowers only as described in [1]. This scoring system makes it possible to calculate a mean value and a standard deviation for the sexual phenotype of each genotype. Each individual genotype (IG) was phenotyped for incompatibility using the stigma test and assigned to one of the two SI groups identified in the species: G1 or G2.

In November 2015, each tree in Orleans was photographed and the intensity of fruiting of each genotype was estimated by counting the clusters of samaras (fruits) on pictures. Trees were assigned to one of the following six classes. 0: no fruit (or no flowering); 1: rare fruits; 2: clusters of samaras present on less than 50% of branches; 3: clusters of samaras present on 50% of branches; 4: clusters of samaras present on more than 50% of branches; 5: clusters of samaras on all branches. \* To test the germination ability of seeds produced by G2 individuals, the very few fruits produced were collected and germinated according to [2] (data not shown). \*\* only stalk observed, no fruit harvested.

References:

- [1] Albert, B., Morand-Prieur, M.-É., Brachet, S., Gouyon, P.-H., Frascaria-Lacoste, N. & Raquin, C. 2013 Sex expression and reproductive biology in a tree species, *Fraxinus excelsior* L. *Comptes Rendus Biologies* **336**, 479-485. (doi:<http://dx.doi.org/10.1016/j.crv.2013.08.004>).
- [2] Raquin, C., Jung-Muller, B., Dufour, J. & Frascaria-Lacoste, N. 2002 Rapid seedling obtaining from European ash species *Fraxinus excelsior* (L.) and *Fraxinus angustifolia* (Vahl.). *Annals of Forest Science* **59**, 219-224.
