# Supplementary material
Source: PubMed Central journal article supplement (PMC5832715)
Supplement: rspb20180004supp5.pdf [file rspb20180004supp5.pdf]

Table S2: Sexual phenotype, incompatibility groups and intensity of fruiting of the *Fraxinus excelsior* trees from the two populations (Camprieu and Aures) located in the Cevennes National Park (southern France).

| Individual genotypes (IG) | Geographic origin of IG | Geographic origin of IG     | Average value of sexual phenotype | SI group | Intensity of fruiting in 2015 |
|---------------------------|-------------------------|-----------------------------|-----------------------------------|----------|-------------------------------|
| Cevennes_1                | Camprieu                | N 44°06'19.4"; E 3°29'36.4" | 1,0                               | G2       | 0                             |
| Cevennes_5                | Camprieu                | N 44°06'19.4"; E 3°29'36.4" | 1,0                               | G2       | 0                             |
| Cevennes_14               | Camprieu                | N 44°06'43.8"; E 3°28'51.9" | 1,0                               | G2       | 0                             |
| Cevennes_18               | Camprieu                | N 44°06'43.8"; E 3°28'51.9" | 1,0                               | G2       | 0                             |
| Cevennes_20               | Camprieu                | N 44°06'43.8"; E 3°28'51.9" | 1,0                               | G2       | 0                             |
| Cevennes_23               | Camprieu                | N 44°06'43.8"; E 3°28'51.9" | 1,0                               | G2       | 0                             |
| Cevennes_25               | Camprieu                | N 44°06'43.8"; E 3°28'51.9" | 1,0                               | G2       | 0                             |
| Cevennes_28               | Camprieu                | N 44°06'43.8"; E 3°28'51.9" | 1,0                               | G2       | 0                             |
| Cevennes_41               | Camprieu                | N 44°06'46.7"; E 3°28'37.5" | 1,0                               | G2       | 0                             |
| Cevennes_42               | Camprieu                | N 44°06'46.7"; E 3°28'37.5" | 1,0                               | G2       | 0                             |
| Cevennes_43               | Camprieu                | N 44°06'46.7"; E 3°28'37.5" | 1,0                               | G2       | 0                             |
| Cevennes_46               | Camprieu                | N 44°06'46.7"; E 3°28'37.5" | 1,0                               | G2       | 0                             |
| Cevennes_48               | Camprieu                | N 44°06'46.7"; E 3°28'37.5" | 1,0                               | G2       | 0                             |
| Cevennes_55               | Camprieu                | N 44°06'46.7"; E 3°28'37.5" | 1,0                               | G2       | 0                             |
| Cevennes_62               | Camprieu                | N 44°06'46.7"; E 3°28'37.5" | 1,0                               | G2       | 0                             |
| Cevennes_70               | Camprieu                | N 44°06'46.6"; E 3°28'31.0" | 1,0                               | G2       | 0                             |
| Cevennes_71               | Camprieu                | N 44°06'46.6"; E 3°28'31.0" | 1,0                               | G2       | 0                             |
| Cevennes_73               | Camprieu                | N 44°06'46.6"; E 3°28'31.0" | 1,0                               | G2       | 0                             |
| Cevennes_96               | Aures                   | N 44°12'45.1"; E 3°28'28.9" | 1,0                               | G2       | 0                             |
| Cevennes_111              | Aures                   | N 44°12'45.1"; E 3°28'28.9" | 1,0                               | G2       | 0                             |
| Cevennes_115              | Aures                   | N 44°12'45.1"; E 3°28'28.9" | 1,0                               | G2       | 0                             |
| Cevennes_118              | Aures                   | N 44°12'45.1"; E 3°28'28.9" | 1,0                               | G2       | 0                             |
| Cevennes_119              | Aures                   | N 44°12'45.1"; E 3°28'28.9" | 1,0                               | G2       | 0                             |
| Cevennes_121              | Aures                   | N 44°12'45.1"; E 3°28'28.9" | 1,0                               | G2       | 0                             |
| Cevennes_123              | Aures                   | N 44°12'45.1"; E 3°28'28.9" | 1,0                               | G2       | 0                             |
| Cevennes_9                | Camprieu                | N 44°06'19.4"; E 3°29'36.4" | 1,5                               | G2       | 0                             |
| Cevennes_30               | Camprieu                | N 44°06'43.8"; E 3°28'51.9" | 1,5                               | G2       | 0                             |
| Cevennes_51               | Camprieu                | N 44°06'46.7"; E 3°28'37.5" | 1,5                               | G2       | 0                             |
| Cevennes_64               | Camprieu                | N 44°06'46.7"; E 3°28'37.5" | 1,5                               | G2       | 0                             |
| Cevennes_113              | Aures                   | N 44°12'45.1"; E 3°28'28.9" | 1,5                               | G2       | 0                             |
| Cevennes_128              | Aures                   | N 44°12'45.1"; E 3°28'28.9" | 1,5/1,5                           | G2       | 0                             |
| Cevennes_17               | Camprieu                | N 44°06'43.8"; E 3°28'51.9" | 2,5/1,0                           | G2       | 0                             |
| Cevennes_33               | Camprieu                | N 44°06'43.8"; E 3°28'51.9" | 2,0                               | G2       | 0                             |
| Cevennes_76               | Camprieu                | N 44°06'46.6"; E 3°28'31.0" | 2,0                               | G2       | 0                             |
| Cevennes_86               | Camprieu                | N 44°06'46.6"; E 3°28'31.0" | 2,0                               | G2       | 0                             |
| Cevennes_95               | Aures                   | N 44°12'45.1"; E 3°28'28.9" | 2,0                               | G2       | 0                             |
| Cevennes_101              | Aures                   | N 44°12'45.1"; E 3°28'28.9" | 2,0                               | G2       | 0                             |
| Cevennes_131              | Aures                   | N 44°12'45.1"; E 3°28'28.9" | 2,0                               | G2       | 0                             |
| Cevennes_132              | Aures                   | N 44°12'45.1"; E 3°28'28.9" | 2,0                               | G2       | 0                             |
| Cevennes_97               | Aures                   | N 44°12'45.1"; E 3°28'28.9" | 2,5                               | G2       | 1                             |
| Cevennes_63               | Camprieu                | N 44°06'46.7"; E 3°28'37.5" | 1,5/4,2                           | G1       | 4                             |
| Cevennes_137              | Aures                   | N 44°12'45.1"; E 3°28'28.9" | 3,0                               | G2       | 1                             |
| Cevennes_133              | Aures                   | N 44°12'45.1"; E 3°28'28.9" | 3,0                               | G1       | 5                             |
| Cevennes_135              | Aures                   | N 44°12'45.1"; E 3°28'28.9" | 3,0/4,0                           | G1       | 5                             |
| Cevennes_27               | Camprieu                | N 44°06'43.8"; E 3°28'51.9" | 4,0                               | G1       | 4                             |
| Cevennes_98               | Aures                   | N 44°12'45.1"; E 3°28'28.9" | 4,0                               | G1       | 3                             |
| Cevennes_134              | Aures                   | N 44°12'45.1"; E 3°28'28.9" | 4,0                               | G1       | 5                             |
| Cevennes_139              | Aures                   | N 44°12'45.1"; E 3°28'28.9" | 4,0                               | G1       | 5                             |
| Cevennes_74               | Camprieu                | N 44°06'46.6"; E 3°28'31.0" | 4,5                               | G1       | 5                             |
| Cevennes_61               | Camprieu                | N 44°06'46.7"; E 3°28'37.5" | 5,0                               | G1       | 1                             |
| Cevennes_93               | Aures                   | N 44°12'45.1"; E 3°28'28.9" | 5,0                               | G1       | 4                             |
| Cevennes_99               | Aures                   | N 44°12'45.1"; E 3°28'28.9" | 5,0                               | G1       | 3                             |
| Cevennes_112              | Aures                   | N 44°12'45.1"; E 3°28'28.9" | 5,0                               | G1       | 2                             |
| Cevennes_117              | Aures                   | N 44°12'45.1"; E 3°28'28.9" | 5,0                               | G1       | 4                             |
| Cevennes_129              | Aures                   | N 44°12'45.1"; E 3°28'28.9" | 4,0/6,0                           | G1       | 4                             |
| Cevennes_78               | Camprieu                | N 44°06'46.6"; E 3°28'31.0" | 5,5                               | G1       | 5                             |
| Cevennes_11               | Camprieu                | N 44°06'43.8"; E 3°28'51.9" | 6,0                               | G1       | 4                             |
| Cevennes_21               | Camprieu                | N 44°06'43.8"; E 3°28'51.9" | 6,0                               | G1       | 1                             |
| Cevennes_110              | Aures                   | N 44°12'45.1"; E 3°28'28.9" | 6,0                               | G1       | 4                             |
| Cevennes_124              | Aures                   | N 44°12'45.1"; E 3°28'28.9" | 6,0                               | G1       | 1                             |
| Cevennes_114              | Aures                   | N 44°12'45.1"; E 3°28'28.9" | 6,5                               | G1       | 4                             |

Of the 140 trees labelled and followed for sexual phenotype and self-incompatibility in the two *F. excelsior* subpopulations located in Camprieu (88 trees) and Aures (52 trees), 61 flowered in 2016 and were included in the study.

Average value of sexual phenotype: for each tree, in 2016, two inflorescences were scored for the proportion of male, hermaphrodite and female flowers and assigned to one of seven phenotypic categories (Albert et al. 2013). For each genotype, a mean value was calculated using the two inflorescence scores. For the few plants that also flowered in 2017 (the two values indicated for 2015/2016), the same survey was performed and we give the average value over the two years.

SI group: each flowering tree was assigned to one SI group (G1 or G2) using interspecific stigma tests.

Intensity of fruiting in 2015: in November 2015, each tree was photographed and the intensity of fruiting of each genotype was estimated by counting the clusters of samaras (fruits) on pictures and assigned to one of the six classes. 0: no fruits; 1: rare fruits; 2: clusters of samaras present on less than 50% of branches; 3: clusters of samaras present on 50% of branches; 4: clusters of samaras present on more than 50% of branches; 5: clusters of samaras on all branches.
