# Supplementary material
Source: PubMed Central journal article supplement (PMC5832715)
Supplement: rspb20180004supp6.pdf [file rspb20180004supp6.pdf]

**Table S3.** List of the 88 referenced tested genotypes (27 in the Orléans collection, and 61 in the Cévennes populations (33 in Camprieu and 28 in Aures)). Each genotype was tested as pollen recipient (R) or as pollen donor (D) for compatibility with G1 and G2 testers: 0 indicates that incompatibility was observed, 1 indicates compatibility was observed. (S): the genotype was tested for self-incompatibility; H: hermaphrodite; M: male. Each tree was assigned to G1 or G2 SI group.

| Tested genotypes |                     |                       |            |                     |          | Genotypes used as testers in stigma test |             |                     |          | Stigma test      |            |
|------------------|---------------------|-----------------------|------------|---------------------|----------|------------------------------------------|-------------|---------------------|----------|------------------|------------|
| Tested as        | Species             | Collection/O<br>rigin | Label      | Sexual<br>phenotype | SI group | Species                                  | Label       | Sexual<br>phenotype | SI group | Date of the test | Conclusion |
| D                | <i>F. excelsior</i> | Orléans               | Orléans_02 | 1.39                | G2       | <i>F. excelsior</i>                      | Orléans_41  | 4.79                | G1       | 22/03/2015       | 1          |
| D                | <i>F. excelsior</i> | Orléans               | Orléans_02 | 1.39                | G2       | <i>F. excelsior</i>                      | Orléans_46  | 4.30                | G1       | 22/03/2015       | 1          |
| D                | <i>F. excelsior</i> | Orléans               | Orléans_02 | 1.39                | G2       | <i>F.ornus</i>                           | G48         | H                   | G2       | 09/05/2015       | 0          |
| D                | <i>F. excelsior</i> | Orléans               | Orléans_03 | 1.05                | G2       | <i>F.ornus</i>                           | B16         | H                   | G1       | 26/04/2015       | 1          |
| D                | <i>F. excelsior</i> | Orléans               | Orléans_03 | 1.05                | G2       | <i>F.ornus</i>                           | G48         | H                   | G2       | 09/05/2015       | 0          |
| D                | <i>F. excelsior</i> | Orléans               | Orléans_03 | 1.05                | G2       | <i>P. angustifolia</i>                   | Pa_07.E_41  | H                   | G2       | 31/03/2015       | 0          |
| D                | <i>F. excelsior</i> | Orléans               | Orléans_03 | 1.05                | G2       | <i>P. angustifolia</i>                   | Pa_10.M_21  | H                   | G1       | 31/03/2015       | 1          |
| R                | <i>F. excelsior</i> | Orléans               | Orléans_06 | 3.97                | G1       | <i>F. excelsior</i>                      | Orléans_08  | 1.73                | G2       | 08/04/2014       | 1          |
| R                | <i>F. excelsior</i> | Orléans               | Orléans_06 | 3.97                | G1       | <i>F. excelsior</i>                      | Orléans_21  | 1.36                | G2       | 08/04/2014       | 1          |
| R                | <i>F. excelsior</i> | Orléans               | Orléans_06 | 3.97                | G1       | <i>F. excelsior</i>                      | Orléans_26  | 1.09                | G2       | 08/04/2014       | 1          |
| R                | <i>F. excelsior</i> | Orléans               | Orléans_06 | 3.97                | G1       | <i>F. excelsior</i>                      | Orléans_27  | 1.07                | G2       | 08/04/2014       | 1          |
| R                | <i>F. excelsior</i> | Orléans               | Orléans_06 | 3.97                | G1       | <i>F. excelsior</i>                      | Orléans_31  | 1.39                | G2       | 08/04/2014       | 1          |
| R                | <i>F. excelsior</i> | Orléans               | Orléans_06 | 3.97                | G1       | <i>F. excelsior</i>                      | Orléans_34  | 4.10                | G1       | 08/04/2014       | 0          |
| R                | <i>F. excelsior</i> | Orléans               | Orléans_06 | 3.97                | G1       | <i>F. excelsior</i>                      | Orléans_35  | 2.53                | G2       | 08/04/2014       | 1          |
| R                | <i>F. excelsior</i> | Orléans               | Orléans_06 | 3.97                | G1       | <i>F. excelsior</i>                      | Orléans_40  | 1.39                | G2       | 08/04/2014       | 1          |
| R                | <i>F. excelsior</i> | Orléans               | Orléans_06 | 3.97                | G1       | <i>P. angustifolia</i>                   | Pa_10.M_21  | H                   | G1       | 08/04/2014       | 0          |
| R                | <i>F. excelsior</i> | Orléans               | Orléans_06 | 3.97                | G1       | <i>P. angustifolia</i>                   | Pa_07.E_41  | H                   | G2       | 08/04/2014       | 1          |
| R                | <i>F. excelsior</i> | Orléans               | Orléans_06 | 3.97                | G1       | <i>P. angustifolia</i>                   | Pa_07.E_50  | M                   | M        | 08/04/2014       | 1          |
| D                | <i>F. excelsior</i> | Orléans               | Orléans_07 | 4.4                 | G1       | <i>F.ornus</i>                           | B16         | H                   | G1       | 26/04/2015       | 0          |
| D                | <i>F. excelsior</i> | Orléans               | Orléans_07 | 4.4                 | G1       | <i>F.ornus</i>                           | G48         | H                   | G2       | 09/05/2015       | 1          |
| R                | <i>F. excelsior</i> | Orléans               | Orléans_07 | 4.4                 | G1       | <i>P. angustifolia</i>                   | Pa_03.15-41 | H                   | G1       | 31/03/2015       | 0          |
| R                | <i>F. excelsior</i> | Orléans               | Orléans_07 | 4.4                 | G1       | <i>P. angustifolia</i>                   | Pa_03.15-37 | H                   | G2       | 31/03/2015       | 1          |
| R                | <i>F. excelsior</i> | Orléans               | Orléans_07 | 4.4                 | G1       | <i>P. angustifolia</i>                   | Pa_07.E_41  | H                   | G2       | 31/03/2015       | 1          |
| D                | <i>F. excelsior</i> | Orléans               | Orléans_07 | 4.4                 | G1       | <i>P. angustifolia</i>                   | Pa_10.M_21  | H                   | G1       | 31/03/2015       | 0          |
| D                | <i>F. excelsior</i> | Orléans               | Orléans_07 | 4.4                 | G1       | <i>P. angustifolia</i>                   | Pa_07.E_41  | H                   | G2       | 31/03/2015       | 1          |
| D                | <i>F. excelsior</i> | Orléans               | Orléans_08 | 1.73                | G2       | <i>F. excelsior</i>                      | Orléans_06  | 3.97                | G1       | 22/03/2015       | 1          |
| D                | <i>F. excelsior</i> | Orléans               | Orléans_08 | 1.73                | G2       | <i>F. excelsior</i>                      | Orléans_33  | 4.79                | G1       | 22/03/2015       | 1          |
| D                | <i>F. excelsior</i> | Orléans               | Orléans_08 | 1.73                | G2       | <i>F. excelsior</i>                      | Orléans_34  | 4.10                | G1       | 22/03/2015       | 1          |

**Table S3.** List of the 88 referenced tested genotypes (27 in the Orléans collection, and 61 in the Cévennes populations (33 in Camprieu and 28 in Aures)). Each genotype was tested as pollen recipient (R) or as pollen donor (D) for compatibility with G1 and G2 testers: 0 indicates that incompatibility was observed, 1 indicates compatibility was observed. (S): the genotype was tested for self-incompatibility; H: hermaphrodite; M: male. Each tree was assigned to G1 or G2 SI group.

| Tested genotypes |                     |                       |            |                     |          | Genotypes used as testers in stigma test |             |                     |          | Stigma test      |            |
|------------------|---------------------|-----------------------|------------|---------------------|----------|------------------------------------------|-------------|---------------------|----------|------------------|------------|
| Tested as        | Species             | Collection/O<br>rigin | Label      | Sexual<br>phenotype | SI group | Species                                  | Label       | Sexual<br>phenotype | SI group | Date of the test | Conclusion |
| D                | <i>F. excelsior</i> | Orléans               | Orléans_08 | 1.73                | G2       | <i>F. excelsior</i>                      | Orléans_41  | 4.79                | G1       | 22/03/2015       | 1          |
| D                | <i>F. excelsior</i> | Orléans               | Orléans_08 | 1.73                | G2       | <i>F. excelsior</i>                      | Orléans_45  | 4.39                | G1       | 22/03/2015       | 1          |
| D                | <i>F. excelsior</i> | Orléans               | Orléans_08 | 1.73                | G2       | <i>F. excelsior</i>                      | Orléans_46  | 4.30                | G1       | 22/03/2015       | 1          |
| D                | <i>F. excelsior</i> | Orléans               | Orléans_08 | 1.73                | G2       | <i>F. ornus</i>                          | B16         | H                   | G1       | 26/04/2015       | 1          |
| D                | <i>F. excelsior</i> | Orléans               | Orléans_08 | 1.73                | G2       | <i>F. ornus</i>                          | G48         | H                   | G2       | 09/05/2015       | 0          |
| D                | <i>F. excelsior</i> | Orléans               | Orléans_10 | 1.51                | G2       | <i>F. ornus</i>                          | B16         | H                   | G1       | 26/04/2015       | 1          |
| D                | <i>F. excelsior</i> | Orléans               | Orléans_10 | 1.51                | G2       | <i>F. ornus</i>                          | G48         | H                   | G2       | 09/05/2015       | 0          |
| D                | <i>F. excelsior</i> | Orléans               | Orléans_10 | 1.51                | G2       | <i>P. angustifolia</i>                   | Pa_10.M_21  | H                   | G1       | 31/03/2015       | 1          |
| D                | <i>F. excelsior</i> | Orléans               | Orléans_10 | 1.51                | G2       | <i>P. angustifolia</i>                   | Pa_07.E_41  | H                   | G2       | 31/03/2015       | 0          |
| S                | <i>F. excelsior</i> | Orléans               | Orléans_11 | 5.90                | G1       | <i>F. excelsior</i>                      | Orléans_11  | 5;90                | G1       | 11/03/2015       | 0          |
| R                | <i>F. excelsior</i> | Orléans               | Orléans_11 | 5.90                | G1       | <i>F. excelsior</i>                      | Orléans_34  | 4.10                | G1       | 11/03/2015       | 0          |
| R                | <i>F. excelsior</i> | Orléans               | Orléans_11 | 5.90                | G1       | <i>F. excelsior</i>                      | Orléans_35  | 2.53                | G2       | 11/03/2015       | 1          |
| R                | <i>F. excelsior</i> | Orléans               | Orléans_11 | 5.90                | G1       | <i>P. angustifolia</i>                   | Pa_03.15_41 | H                   | G1       | 11/03/2015       | 0          |
| R                | <i>F. excelsior</i> | Orléans               | Orléans_11 | 5.90                | G1       | <i>P. angustifolia</i>                   | Pa_03.15_37 | H                   | G2       | 11/03/2015       | 1          |
| R                | <i>F. excelsior</i> | Orléans               | Orléans_11 | 5.90                | G1       | <i>P. angustifolia</i>                   | Pa_07.E_50  | M                   | M        | 11/03/2015       | 1          |
| S                | <i>F. excelsior</i> | Orléans               | Orléans_14 | 1.37                | G2       | <i>F. excelsior</i>                      | Orléans_14  | 1.37                | G2       | 11/03/2017       | 1_0_0      |
| D                | <i>F. excelsior</i> | Orléans               | Orléans_14 | 1.37                | G2       | <i>P. angustifolia</i>                   | Pa_07.E_24  | H                   | G1       | 11/03/2017       | 1          |
| D                | <i>F. excelsior</i> | Orléans               | Orléans_14 | 1.37                | G2       | <i>P. angustifolia</i>                   | Pa_07.D_10  | H                   | G2       | 11/03/2017       | 0          |
| S                | <i>F. excelsior</i> | Orléans               | Orléans_15 | 4.67                | G1       | <i>F. excelsior</i>                      | Orléans_15  | 4.67                | G1       | 10/03/2017       | 0          |
| D+R              | <i>F. excelsior</i> | Orléans               | Orléans_15 | 4.67                | G1       | <i>P. angustifolia</i>                   | Pa_07.E_24  | H                   | G1       | 10/03/2017       | 0          |
| D+R              | <i>F. excelsior</i> | Orléans               | Orléans_15 | 4.67                | G1       | <i>P. angustifolia</i>                   | Pa_07.D_10  | H                   | G2       | 10/03/2017       | 1          |
| R                | <i>F. excelsior</i> | Orléans               | Orléans_16 | 5.00                | G1       | <i>P. angustifolia</i>                   | Pa_07.E_24  | H                   | G1       | 08/03/2017       | 0          |
| R                | <i>F. excelsior</i> | Orléans               | Orléans_16 | 5.00                | G1       | <i>P. angustifolia</i>                   | Pa_07.D_10  | H                   | G2       | 08/03/2017       | 1          |
| S                | <i>F. excelsior</i> | Orléans               | Orléans_16 | 5.00                | G1       | <i>P. angustifolia</i>                   | Pa_07.E_24  | H                   | G1       | 10/03/2017       | 0          |
| D                | <i>F. excelsior</i> | Orléans               | Orléans_18 | 1.47                | G2       | <i>F. excelsior</i>                      | Orléans_34  | 4.10                | G1       | 24/03/2015       | 1          |
| D                | <i>F. excelsior</i> | Orléans               | Orléans_18 | 1.47                | G2       | <i>F. ornus</i>                          | B16         | H                   | G1       | 26/04/2015       | 1          |
| D                | <i>F. excelsior</i> | Orléans               | Orléans_18 | 1.47                | G2       | <i>F. ornus</i>                          | G48         | H                   | G2       | 09/05/2015       | 0          |
| D                | <i>F. excelsior</i> | Orléans               | Orléans_18 | 1.47                | G2       | <i>P. angustifolia</i>                   | Pa_10.M_21  | H                   | G1       | 31/03/2015       | 1          |

**Table S3.** List of the 88 referenced tested genotypes (27 in the Orléans collection, and 61 in the Cévennes populations (33 in Camprieu and 28 in Aures)). Each genotype was tested as pollen recipient (R) or as pollen donor (D) for compatibility with G1 and G2 testers: 0 indicates that incompatibility was observed, 1 indicates compatibility was observed. (S): the genotype was tested for self-incompatibility; H: hermaphrodite; M: male. Each tree was assigned to G1 or G2 SI group.

| Tested genotypes |                     |                    |            |                  |          | Genotypes used as testers in stigma test |            |                  |          | Stigma test      |            |
|------------------|---------------------|--------------------|------------|------------------|----------|------------------------------------------|------------|------------------|----------|------------------|------------|
| Tested as        | Species             | Collection/O rigin | Label      | Sexual phenotype | SI group | Species                                  | Label      | Sexual phenotype | SI group | Date of the test | Conclusion |
| D                | <i>F. excelsior</i> | Orléans            | Orléans_18 | 1.47             | G2       | <i>P. angustifolia</i>                   | Pa_07.E_41 | H                | G2       | 31/03/2015       | 0          |
| D                | <i>F. excelsior</i> | Orléans            | Orléans_21 | 1.36             | G2       | <i>F. excelsior</i>                      | Orléans_06 | 3.97             | G1       | 27/03/2015       | 1          |
| D                | <i>F. excelsior</i> | Orléans            | Orléans_21 | 1.36             | G2       | <i>F. excelsior</i>                      | Orléans_34 | 4.10             | G1       | 24/03/2015       | 1          |
| D                | <i>F. excelsior</i> | Orléans            | Orléans_21 | 1.36             | G2       | <i>F. excelsior</i>                      | Orléans_35 | 2.53             | G2       | 24/03/2015       | 0          |
| D                | <i>F. excelsior</i> | Orléans            | Orléans_21 | 1.36             | G2       | <i>F. excelsior</i>                      | Orléans_41 | 4.80             | G1       | 24/03/2015       | 1          |
| D                | <i>F. excelsior</i> | Orléans            | Orléans_21 | 1.36             | G2       | <i>F. excelsior</i>                      | Orléans_45 | 4.39             | G1       | 24/03/2015       | 1          |
| D                | <i>F. excelsior</i> | Orléans            | Orléans_21 | 1.36             | G2       | <i>F. excelsior</i>                      | Orléans_46 | 4.30             | G1       | 22/03/2015       | 1          |
| D                | <i>F. excelsior</i> | Orléans            | Orléans_21 | 1.36             | G2       | <i>F.ornus</i>                           | B16        | H                | G1       | 26/04/2015       | 1          |
| D                | <i>F. excelsior</i> | Orléans            | Orléans_21 | 1.36             | G2       | <i>F.ornus</i>                           | G48        | H                | G2       | 09/05/2015       | 0          |
| D                | <i>F. excelsior</i> | Orléans            | Orléans_26 | 1.09             | G2       | <i>F. excelsior</i>                      | Orléans_06 | 3.97             | G1       | 27/03/2014       | 1          |
| D                | <i>F. excelsior</i> | Orléans            | Orléans_26 | 1.09             | G2       | <i>F. excelsior</i>                      | Orléans_34 | 4.10             | G1       | 24/03/2014       | 1          |
| D                | <i>F. excelsior</i> | Orléans            | Orléans_26 | 1.09             | G2       | <i>F. excelsior</i>                      | Orléans_41 | 4.79             | G1       | 22/03/2015       | 1          |
| D                | <i>F. excelsior</i> | Orléans            | Orléans_26 | 1.09             | G2       | <i>F. excelsior</i>                      | Orléans_45 | 4.39             | G1       | 27/03/2014       | 1          |
| D                | <i>F. excelsior</i> | Orléans            | Orléans_26 | 1.09             | G2       | <i>F.ornus</i>                           | B16        | H                | G1       | 26/04/2015       | 1          |
| D                | <i>F. excelsior</i> | Orléans            | Orléans_26 | 1.09             | G2       | <i>F.ornus</i>                           | G48        | H                | G2       | 09/05/2015       | 0          |
| D                | <i>F. excelsior</i> | Orléans            | Orléans_27 | 1.07             | G2       | <i>F. excelsior</i>                      | Orléans_06 | 3.97             | G1       | 27/03/2014       | 1          |
| D                | <i>F. excelsior</i> | Orléans            | Orléans_27 | 1.07             | G2       | <i>F. excelsior</i>                      | Orléans_34 | 4.10             | G1       | 24/03/2014       | 1          |
| D                | <i>F. excelsior</i> | Orléans            | Orléans_27 | 1.07             | G2       | <i>F. excelsior</i>                      | Orléans_41 | 4.79             | G1       | 22/03/2015       | 1          |
| D                | <i>F. excelsior</i> | Orléans            | Orléans_27 | 1.07             | G2       | <i>F. excelsior</i>                      | Orléans_46 | 4.30             | G1       | 22/03/2015       | 1          |
| D                | <i>F. excelsior</i> | Orléans            | Orléans_27 | 1.07             | G2       | <i>F.ornus</i>                           | B16        | H                | G1       | 26/04/2015       | 1          |
| D                | <i>F. excelsior</i> | Orléans            | Orléans_27 | 1.07             | G2       | <i>F.ornus</i>                           | G48        | H                | G2       | 09/05/2015       | 0          |
| D                | <i>F. excelsior</i> | Orléans            | Orléans_31 | 1.39             | G2       | <i>F. excelsior</i>                      | Orléans_06 | 3.97             | G1       | 27/03/2014       | 1          |
| D                | <i>F. excelsior</i> | Orléans            | Orléans_31 | 1.39             | G2       | <i>F. excelsior</i>                      | Orléans_34 | 4.09             | G1       | 24/03/2014       | 1          |
| D                | <i>F. excelsior</i> | Orléans            | Orléans_31 | 1.39             | G2       | <i>F. excelsior</i>                      | Orléans_41 | 4.79             | G1       | 22/03/2015       | 1          |
| D                | <i>F. excelsior</i> | Orléans            | Orléans_31 | 1.39             | G2       | <i>F. excelsior</i>                      | Orléans_46 | 4.30             | G1       | 22/03/2015       | 1          |
| D                | <i>F. excelsior</i> | Orléans            | Orléans_31 | 1.39             | G2       | <i>F.ornus</i>                           | B16        | H                | G1       | 26/04/2015       | 1          |
| D                | <i>F. excelsior</i> | Orléans            | Orléans_31 | 1.39             | G2       | <i>F.ornus</i>                           | G48        | H                | G2       | 09/05/2015       | 0          |
| R                | <i>F. excelsior</i> | Orléans            | Orléans_31 | 1.39             | G2       | <i>P. angustifolia</i>                   | Pa_07.E_70 | M                | M        | 11/03/2015       | 1          |

**Table S3.** List of the 88 referenced tested genotypes (27 in the Orléans collection, and 61 in the Cévennes populations (33 in Camprieu and 28 in Aures)). Each genotype was tested as pollen recipient (R) or as pollen donor (D) for compatibility with G1 and G2 testers: 0 indicates that incompatibility was observed, 1 indicates compatibility was observed. (S): the genotype was tested for self-incompatibility; H: hermaphrodite; M: male. Each tree was assigned to G1 or G2 SI group.

| Tested genotypes |                     |                       |            |                     |          | Genotypes used as testers in stigma test |             |                     |          | Stigma test      |            |
|------------------|---------------------|-----------------------|------------|---------------------|----------|------------------------------------------|-------------|---------------------|----------|------------------|------------|
| Tested as        | Species             | Collection/O<br>rigin | Label      | Sexual<br>phenotype | SI group | Species                                  | Label       | Sexual<br>phenotype | SI group | Date of the test | Conclusion |
| S                | <i>F. excelsior</i> | Orléans               | Orléans_32 | 4,00                | G1       | <i>F. excelsior</i>                      | Orléans_32  | 4,00                | G1       | 22/03/2015       | 0          |
| D                | <i>F. excelsior</i> | Orléans               | Orléans_32 | 4,00                | G1       | <i>F. excelsior</i>                      | Orléans_41  | 4.79                | G1       | 22/03/2015       | 0          |
| D                | <i>F. excelsior</i> | Orléans               | Orléans_32 | 4,00                | G1       | <i>F. excelsior</i>                      | Orléans_46  | 4.30                | G1       | 22/03/2015       | 0          |
| R                | <i>F. excelsior</i> | Orléans               | Orléans_32 | 4,00                | G1       | <i>P. angustifolia</i>                   | Pa_07.E_24  | H                   | G1       | 22/03/2015       | 0          |
| R                | <i>F. excelsior</i> | Orléans               | Orléans_32 | 4,00                | G1       | <i>P. angustifolia</i>                   | Pa_06.G_41  | H                   | G2       | 22/03/2015       | 1          |
| R                | <i>F. excelsior</i> | Orléans               | Orléans_33 | 4.42                | G1       | <i>F. excelsior</i>                      | Orléans_08  | 1.73                | G2       | 08/04/2014       | 1          |
| R                | <i>F. excelsior</i> | Orléans               | Orléans_33 | 4.42                | G1       | <i>F. excelsior</i>                      | Orléans_34  | 4.10                | G1       | 08/04/2014       | 0          |
| R                | <i>F. excelsior</i> | Orléans               | Orléans_33 | 4.42                | G1       | <i>F. excelsior</i>                      | Orléans_35  | 2.53                | G2       | 08/04/2014       | 1          |
| R                | <i>F. excelsior</i> | Orléans               | Orléans_33 | 4.42                | G1       | <i>P. angustifolia</i>                   | Pa_03.15_41 | H                   | G1       | 08/04/2014       | 0          |
| R                | <i>F. excelsior</i> | Orléans               | Orléans_33 | 4.42                | G1       | <i>P. angustifolia</i>                   | Pa_03.15_35 | H                   | G2       | 08/04/2014       | 1          |
| R                | <i>F. excelsior</i> | Orléans               | Orléans_33 | 4.42                | G1       | <i>P. angustifolia</i>                   | Pa_06.G-70  | M                   | M        | 08/04/2014       | 1          |
| D                | <i>F. excelsior</i> | Orléans               | Orléans_34 | 4.10                | G1       | <i>F. excelsior</i>                      | Orléans_06  | 3.97                | G1       | 27/03/2014       | 0          |
| R                | <i>F. excelsior</i> | Orléans               | Orléans_34 | 4.10                | G1       | <i>F. excelsior</i>                      | Orléans_08  | 1.72                | G2       | 27/03/2014       | 1          |
| D                | <i>F. excelsior</i> | Orléans               | Orléans_34 | 4.10                | G1       | <i>F. excelsior</i>                      | Orléans_11  | 5.90                | G1       | 11/03/2015       | 0          |
| R                | <i>F. excelsior</i> | Orléans               | Orléans_34 | 4.10                | G1       | <i>F. excelsior</i>                      | Orléans_18  | 1.47                | G2       | 27/03/2014       | 1          |
| R                | <i>F. excelsior</i> | Orléans               | Orléans_34 | 4.10                | G1       | <i>F. excelsior</i>                      | Orléans_21  | 1.36                | G2       | 27/03/2014       | 1          |
| R                | <i>F. excelsior</i> | Orléans               | Orléans_34 | 4.10                | G1       | <i>F. excelsior</i>                      | Orléans_26  | 1.09                | G2       | 27/03/2014       | 1          |
| R                | <i>F. excelsior</i> | Orléans               | Orléans_34 | 4.10                | G1       | <i>F. excelsior</i>                      | Orléans_27  | 1.07                | G2       | 27/03/2014       | 1          |
| R                | <i>F. excelsior</i> | Orléans               | Orléans_34 | 4.10                | G1       | <i>F. excelsior</i>                      | Orléans_31  | 1.37                | G2       | 27/03/2014       | 1          |
| S                | <i>F. excelsior</i> | Orléans               | Orléans_34 | 4.10                | G1       | <i>F. excelsior</i>                      | Orléans_34  | 4.10                | G1       | 27/03/2014       | 0          |
| R                | <i>F. excelsior</i> | Orléans               | Orléans_34 | 4.10                | G1       | <i>F. excelsior</i>                      | Orléans_35  | 2.53                | G2       | 27/03/2014       | 1          |
| R                | <i>F. excelsior</i> | Orléans               | Orléans_34 | 4.10                | G1       | <i>F. excelsior</i>                      | Orléans_38  | 1.39                | G2       | 27/03/2014       | 1          |
| R                | <i>F. excelsior</i> | Orléans               | Orléans_34 | 4.10                | G1       | <i>F. excelsior</i>                      | Orléans_39  | 1.39                | G2       | 27/03/2014       | 1          |
| R                | <i>F. excelsior</i> | Orléans               | Orléans_34 | 4.10                | G1       | <i>F. excelsior</i>                      | Orléans_40  | 1.39                | G2       | 27/03/2014       | 1          |
| D                | <i>F. excelsior</i> | Orléans               | Orléans_34 | 4.10                | G1       | <i>F. excelsior</i>                      | Orléans_41  | 4.79                | G1       | 22/03/2015       | 0          |
| R                | <i>F. excelsior</i> | Orléans               | Orléans_34 | 4.10                | G1       | <i>F. excelsior</i>                      | Orléans_42  | 1.82                | G2       | 27/03/2014       | 1          |
| D                | <i>F. excelsior</i> | Orléans               | Orléans_34 | 4.10                | G1       | <i>F. excelsior</i>                      | Orléans_44  | 5.35                | G1       | 11/03/2015       | 0          |
| D                | <i>F. excelsior</i> | Orléans               | Orléans_34 | 4.10                | G1       | <i>F. excelsior</i>                      | Orléans_45  | 4.39                | G1       | 27/03/2014       | 0          |

**Table S3.** List of the 88 referenced tested genotypes (27 in the Orléans collection, and 61 in the Cévennes populations (33 in Camprieu and 28 in Aures)). Each genotype was tested as pollen recipient (R) or as pollen donor (D) for compatibility with G1 and G2 testers: 0 indicates that incompatibility was observed, 1 indicates compatibility was observed. (S): the genotype was tested for self-incompatibility; H: hermaphrodite; M: male. Each tree was assigned to G1 or G2 SI group.

| Tested genotypes |                     |                       |            |                     |          | Genotypes used as testers in stigma test |             |                     |          | Stigma test      |            |
|------------------|---------------------|-----------------------|------------|---------------------|----------|------------------------------------------|-------------|---------------------|----------|------------------|------------|
| Tested as        | Species             | Collection/O<br>rigin | Label      | Sexual<br>phenotype | SI group | Species                                  | Label       | Sexual<br>phenotype | SI group | Date of the test | Conclusion |
| D+R              | <i>F. excelsior</i> | Orléans               | Orléans_34 | 4.10                | G1       | <i>F. excelsior</i>                      | Orléans_46  | 4.30                | G1       | 11/03/2015       | 0          |
| D                | <i>F. excelsior</i> | Orléans               | Orléans_34 | 4.10                | G1       | <i>F.ornus</i>                           | B16         | H                   | G1       | 26/04/2015       | 0          |
| D                | <i>F. excelsior</i> | Orléans               | Orléans_34 | 4.10                | G1       | <i>F.ornus</i>                           | G48         | H                   | G2       | 09/05/2015       | 1          |
| D                | <i>F. excelsior</i> | Orléans               | Orléans_34 | 4.10                | G1       | <i>P. angustifolia</i>                   | Pa_03.15_41 | H                   | G1       | 11/03/2015       | 0          |
| D                | <i>F. excelsior</i> | Orléans               | Orléans_34 | 4.10                | G1       | <i>P. angustifolia</i>                   | Pa_03.15_35 | H                   | G2       | 11/03/2015       | 1          |
| D                | <i>F. excelsior</i> | Orléans               | Orléans_34 | 4.10                | G1       | <i>P. angustifolia</i>                   | Pa_03.15_37 | H                   | G2       | 27/03/2014       | 1          |
| D                | <i>F. excelsior</i> | Orléans               | Orléans_34 | 4.10                | G1       | <i>P. angustifolia</i>                   | Pa_07.E_50  | M                   | M        | 11/03/2015       | 1          |
| D                | <i>F. excelsior</i> | Orléans               | Orléans_34 | 4.10                | G1       | <i>P. angustifolia</i>                   | Pa_06.G-70  | M                   | M        | 27/03/2014       | 1          |
| D                | <i>F. excelsior</i> | Orléans               | Orléans_35 | 2.53                | G2       | <i>F. excelsior</i>                      | Orléans_11  | 5.90                | G1       | 11/03/2015       | 1          |
| R                | <i>F. excelsior</i> | Orléans               | Orléans_35 | 2.53                | G2       | <i>F. excelsior</i>                      | Orléans_21  | 1.36                | G2       | 24/03/2014       | 0          |
| D                | <i>F. excelsior</i> | Orléans               | Orléans_35 | 2.53                | G2       | <i>F. excelsior</i>                      | Orléans_33  | 4.79                | G1       | 27/03/2014       | 1          |
| D                | <i>F. excelsior</i> | Orléans               | Orléans_35 | 2.53                | G2       | <i>F. excelsior</i>                      | Orléans_34  | 4.10                | G1       | 24/03/2014       | 1          |
| S                | <i>F. excelsior</i> | Orléans               | Orléans_35 | 2.53                | G2       | <i>F. excelsior</i>                      | Orléans_35  | 2.53                | G2       | 24/03/2014       | 0          |
| R                | <i>F. excelsior</i> | Orléans               | Orléans_35 | 2.53                | G2       | <i>F. excelsior</i>                      | Orléans_40  | 1.39                | G2       | 24/03/2014       | 0          |
| D                | <i>F. excelsior</i> | Orléans               | Orléans_35 | 2.53                | G2       | <i>F. excelsior</i>                      | Orléans_41  | 4.79                | G1       | 22/03/2015       | 1          |
| D                | <i>F. excelsior</i> | Orléans               | Orléans_35 | 2.53                | G2       | <i>F. excelsior</i>                      | Orléans_44  | 5.35                | G1       | 11/03/2015       | 1          |
| D                | <i>F. excelsior</i> | Orléans               | Orléans_35 | 2.53                | G2       | <i>F. excelsior</i>                      | Orléans_45  | 4.39                | G1       | 27/03/2014       | 1          |
| D                | <i>F. excelsior</i> | Orléans               | Orléans_35 | 2.53                | G2       | <i>F. excelsior</i>                      | Orléans_46  | 4.30                | G1       | 11/03/2015       | 1          |
| D                | <i>F. excelsior</i> | Orléans               | Orléans_35 | 2.53                | G2       | <i>F.ornus</i>                           | B16         | H                   | G1       | 26/04/2015       | 1          |
| D                | <i>F. excelsior</i> | Orléans               | Orléans_35 | 2.53                | G2       | <i>F.ornus</i>                           | G48         | H                   | G2       | 09/05/2015       | 0          |
| D                | <i>F. excelsior</i> | Orléans               | Orléans_38 | 1.39                | G2       | <i>F. excelsior</i>                      | Orléans_34  | 4.10                | G1       | 24/03/2014       | 1          |
| D                | <i>F. excelsior</i> | Orléans               | Orléans_38 | 1.39                | G2       | <i>F.ornus</i>                           | B16         | H                   | G1       | 26/04/2015       | 1          |
| D                | <i>F. excelsior</i> | Orléans               | Orléans_38 | 1.39                | G2       | <i>F.ornus</i>                           | G48         | H                   | G2       | 09/05/2015       | 0          |
| D                | <i>F. excelsior</i> | Orléans               | Orléans_38 | 1.39                | G2       | <i>P. angustifolia</i>                   | Pa_10.M_21  | H                   | G1       | 31/03/2015       | 1          |
| D                | <i>F. excelsior</i> | Orléans               | Orléans_38 | 1.39                | G2       | <i>P. angustifolia</i>                   | Pa_07.E_41  | H                   | G2       | 31/03/2015       | 0          |
| D                | <i>F. excelsior</i> | Orléans               | Orléans_39 | 1.39                | G2       | <i>F. excelsior</i>                      | Orléans_34  | 4.10                | G1       | 24/03/2014       | 1          |
| D                | <i>F. excelsior</i> | Orléans               | Orléans_39 | 1.39                | G2       | <i>F.ornus</i>                           | B16         | H                   | G1       | 26/04/2015       | 1          |
| D                | <i>F. excelsior</i> | Orléans               | Orléans_39 | 1.39                | G2       | <i>F.ornus</i>                           | G48         | H                   | G2       | 09/05/2015       | 0          |

**Table S3.** List of the 88 referenced tested genotypes (27 in the Orléans collection, and 61 in the Cévennes populations (33 in Camprieu and 28 in Aures)). Each genotype was tested as pollen recipient (R) or as pollen donor (D) for compatibility with G1 and G2 testers: 0 indicates that incompatibility was observed, 1 indicates compatibility was observed. (S): the genotype was tested for self-incompatibility; H: hermaphrodite; M: male. Each tree was assigned to G1 or G2 SI group.

| Tested genotypes |                     |                    |            |                  |          | Genotypes used as testers in stigma test |            |                  |          | Stigma test      |            |
|------------------|---------------------|--------------------|------------|------------------|----------|------------------------------------------|------------|------------------|----------|------------------|------------|
| Tested as        | Species             | Collection/O rigin | Label      | Sexual phenotype | SI group | Species                                  | Label      | Sexual phenotype | SI group | Date of the test | Conclusion |
| D                | <i>F. excelsior</i> | Orléans            | Orléans_39 | 1.39             | G2       | <i>P. angustifolia</i>                   | Pa_10.M_21 | H                | G1       | 31/03/2015       | 1          |
| D                | <i>F. excelsior</i> | Orléans            | Orléans_39 | 1.39             | G2       | <i>P. angustifolia</i>                   | Pa_07.E_41 | H                | G2       | 31/03/2015       | 0          |
| D                | <i>F. excelsior</i> | Orléans            | Orléans_40 | 1.39             | G2       | <i>F. excelsior</i>                      | Orléans_06 | 3.97             | G1       | 27/03/2014       | 1          |
| D                | <i>F. excelsior</i> | Orléans            | Orléans_40 | 1.39             | G2       | <i>F. excelsior</i>                      | Orléans_34 | 4.10             | G1       | 24/03/2014       | 1          |
| D                | <i>F. excelsior</i> | Orléans            | Orléans_40 | 1.39             | G2       | <i>F. excelsior</i>                      | Orléans_35 | 2.53             | G2       | 24/03/2014       | 0          |
| D                | <i>F. excelsior</i> | Orléans            | Orléans_40 | 1.39             | G2       | <i>F.ornus</i>                           | B16        | H                | G1       | 26/04/2015       | 1          |
| D                | <i>F. excelsior</i> | Orléans            | Orléans_40 | 1.39             | G2       | <i>F.ornus</i>                           | G48        | H                | G2       | 09/05/2015       | 0          |
| D                | <i>F. excelsior</i> | Orléans            | Orléans_40 | 1.39             | G2       | <i>P. angustifolia</i>                   | Pa_10.M_21 | H                | G1       | 31/03/2015       | 1          |
| D                | <i>F. excelsior</i> | Orléans            | Orléans_40 | 1.39             | G2       | <i>P. angustifolia</i>                   | Pa_07.E_41 | H                | G2       | 31/03/2015       | 0          |
| R                | <i>F. excelsior</i> | Orléans            | Orléans_41 | 4.79             | G1       | <i>F. excelsior</i>                      | Orléans_02 | 1,00             | G2       | 22/03/2015       | 1          |
| R                | <i>F. excelsior</i> | Orléans            | Orléans_41 | 4.79             | G1       | <i>F. excelsior</i>                      | Orléans_08 | 1.72             | G2       | 22/03/2015       | 1          |
| R                | <i>F. excelsior</i> | Orléans            | Orléans_41 | 4.79             | G1       | <i>F. excelsior</i>                      | Orléans_21 | 1.35             | G2       | 22/03/2015       | 1          |
| R                | <i>F. excelsior</i> | Orléans            | Orléans_41 | 4.79             | G1       | <i>F. excelsior</i>                      | Orléans_26 | 1.09             | G2       | 22/03/2015       | 1          |
| R                | <i>F. excelsior</i> | Orléans            | Orléans_41 | 4.79             | G1       | <i>F. excelsior</i>                      | Orléans_27 | 1.07             | G2       | 22/03/2015       | 1          |
| R                | <i>F. excelsior</i> | Orléans            | Orléans_41 | 4.79             | G1       | <i>F. excelsior</i>                      | Orléans_31 | 1.39             | G2       | 22/03/2015       | 1          |
| R                | <i>F. excelsior</i> | Orléans            | Orléans_41 | 4.79             | G1       | <i>F. excelsior</i>                      | Orléans_32 | 4,00             | G1       | 22/03/2015       | 0          |
| R                | <i>F. excelsior</i> | Orléans            | Orléans_41 | 4.79             | G1       | <i>F. excelsior</i>                      | Orléans_34 | 4.10             | G1       | 22/03/2015       | 0          |
| R                | <i>F. excelsior</i> | Orléans            | Orléans_41 | 4.79             | G1       | <i>F. excelsior</i>                      | Orléans_35 | 2.53             | G2       | 22/03/2015       | 1          |
| S                | <i>F. excelsior</i> | Orléans            | Orléans_41 | 4.79             | G1       | <i>F. excelsior</i>                      | Orléans_41 | 4.79             | G1       | 22/03/2015       | 0          |
| R                | <i>F. excelsior</i> | Orléans            | Orléans_41 | 4.79             | G1       | <i>F. excelsior</i>                      | Orléans_42 | 1.82             | G2       | 22/03/2015       | 1          |
| D+R              | <i>F. excelsior</i> | Orléans            | Orléans_41 | 4.79             | G1       | <i>F. excelsior</i>                      | Orléans_46 | 4.30             | G1       | 22/03/2015       | 0          |
| D                | <i>F. excelsior</i> | Orléans            | Orléans_41 | 4.79             | G1       | <i>F.ornus</i>                           | B16        | H                | G1       | 26/04/2015       | 0          |
| D                | <i>F. excelsior</i> | Orléans            | Orléans_42 | 1.82             | G2       | <i>F. excelsior</i>                      | Orléans_34 | 4.10             | G1       | 24/03/2014       | 1          |
| D                | <i>F. excelsior</i> | Orléans            | Orléans_42 | 1.82             | G2       | <i>F. excelsior</i>                      | Orléans_41 | 4.79             | G1       | 22/03/2015       | 1          |
| S                | <i>F. excelsior</i> | Orléans            | Orléans_42 | 1.82             | G2       | <i>F. excelsior</i>                      | Orléans_42 | 1.82             | G2       | 27/03/2014       | 0          |
| D                | <i>F. excelsior</i> | Orléans            | Orléans_42 | 1.82             | G2       | <i>F. excelsior</i>                      | Orléans_46 | 4.30             | G1       | 22/03/2015       | 1          |
| D                | <i>F. excelsior</i> | Orléans            | Orléans_42 | 1.82             | G2       | <i>F.ornus</i>                           | B16        | H                | G1       | 26/04/2015       | 1          |
| D                | <i>F. excelsior</i> | Orléans            | Orléans_42 | 1.82             | G2       | <i>F.ornus</i>                           | G48        | H                | G2       | 09/05/2015       | 0          |

**Table S3.** List of the 88 referenced tested genotypes (27 in the Orléans collection, and 61 in the Cévennes populations (33 in Camprieu and 28 in Aures)). Each genotype was tested as pollen recipient (R) or as pollen donor (D) for compatibility with G1 and G2 testers: 0 indicates that incompatibility was observed, 1 indicates compatibility was observed. (S): the genotype was tested for self-incompatibility; H: hermaphrodite; M: male. Each tree was assigned to G1 or G2 SI group.

| Tested genotypes |                     |                       |            |                     |          | Genotypes used as testers in stigma test |            |                     |          | Stigma test      |            |
|------------------|---------------------|-----------------------|------------|---------------------|----------|------------------------------------------|------------|---------------------|----------|------------------|------------|
| Tested as        | Species             | Collection/O<br>rigin | Label      | Sexual<br>phenotype | SI group | Species                                  | Label      | Sexual<br>phenotype | SI group | Date of the test | Conclusion |
| D                | <i>F. excelsior</i> | Orléans               | Orléans_42 | 1.82                | G2       | <i>P. angustifolia</i>                   | Pa_10.M_21 | H                   | G1       | 31/03/2015       | 1          |
| D                | <i>F. excelsior</i> | Orléans               | Orléans_42 | 1.82                | G2       | <i>P. angustifolia</i>                   | Pa_07.E_41 | H                   | G2       | 31/03/2015       | 0          |
| R                | <i>F. excelsior</i> | Orléans               | Orléans_44 | 5.35                | G1       | <i>F. excelsior</i>                      | Orléans_34 | 4.10                | G1       | 11/03/2015       | 0          |
| R                | <i>F. excelsior</i> | Orléans               | Orléans_44 | 5.35                | G1       | <i>F. excelsior</i>                      | Orléans_35 | 2.53                | G2       | 11/03/2015       | 1          |
| R                | <i>F. excelsior</i> | Orléans               | Orléans_44 | 5.35                | G1       | <i>P. angustifolia</i>                   | Pa_07.E_41 | H                   | G1       | 11/03/2015       | 0          |
| R                | <i>F. excelsior</i> | Orléans               | Orléans_44 | 5.35                | G1       | <i>P. angustifolia</i>                   | Pa_07.E_50 | M                   | M        | 11/03/2015       | 1          |
| R                | <i>F. excelsior</i> | Orléans               | Orléans_45 | 4.39                | G1       | <i>F. excelsior</i>                      | Orléans_08 | 1.73                | G2       | 08/04/2014       | 1          |
| R                | <i>F. excelsior</i> | Orléans               | Orléans_45 | 4.39                | G1       | <i>F. excelsior</i>                      | Orléans_21 | 1.36                | G2       | 08/04/2014       | 1          |
| R                | <i>F. excelsior</i> | Orléans               | Orléans_45 | 4.39                | G1       | <i>F. excelsior</i>                      | Orléans_26 | 1.09                | G2       | 08/04/2014       | 1          |
| R                | <i>F. excelsior</i> | Orléans               | Orléans_45 | 4.39                | G1       | <i>F. excelsior</i>                      | Orléans_34 | 4.10                | G1       | 08/04/2014       | 0          |
| R                | <i>F. excelsior</i> | Orléans               | Orléans_45 | 4.39                | G1       | <i>F. excelsior</i>                      | Orléans_35 | 2.53                | G2       | 08/04/2014       | 1          |
| D                | <i>F. excelsior</i> | Orléans               | Orléans_45 | 4.39                | G1       | <i>F.ornus</i>                           | B16        | H                   | G1       | 26/04/2015       | 0          |
| D                | <i>F. excelsior</i> | Orléans               | Orléans_45 | 4.39                | G1       | <i>F.ornus</i>                           | G48        | H                   | G2       | 09/05/2015       | 1          |
| R                | <i>F. excelsior</i> | Orléans               | Orléans_45 | 4.39                | G1       | <i>P. angustifolia</i>                   | Pa_10.M_21 | H                   | G1       | 08/04/2014       | 0          |
| R                | <i>F. excelsior</i> | Orléans               | Orléans_45 | 4.39                | G1       | <i>P. angustifolia</i>                   | Pa_07.E_41 | H                   | G2       | 08/04/2014       | 1          |
| R                | <i>F. excelsior</i> | Orléans               | Orléans_45 | 4.39                | G1       | <i>P. angustifolia</i>                   | Pa_07.E_70 | M                   | M        | 08/04/2014       | 1          |
| R                | <i>F. excelsior</i> | Orléans               | Orléans_46 | 4.30                | G1       | <i>F. excelsior</i>                      | Orléans_02 | 1.00                | G2       | 22/03/2015       | 1          |
| R                | <i>F. excelsior</i> | Orléans               | Orléans_46 | 4.30                | G1       | <i>F. excelsior</i>                      | Orléans_08 | 1.73                | G2       | 22/03/2015       | 1          |
| R                | <i>F. excelsior</i> | Orléans               | Orléans_46 | 4.30                | G1       | <i>F. excelsior</i>                      | Orléans_21 | 1.36                | G2       | 22/03/2015       | 1          |
| R                | <i>F. excelsior</i> | Orléans               | Orléans_46 | 4.30                | G1       | <i>F. excelsior</i>                      | Orléans_26 | 1.09                | G2       | 22/03/2015       | 1          |
| R                | <i>F. excelsior</i> | Orléans               | Orléans_46 | 4.30                | G1       | <i>F. excelsior</i>                      | Orléans_27 | 1.07                | G2       | 22/03/2015       | 1          |
| R                | <i>F. excelsior</i> | Orléans               | Orléans_46 | 4.30                | G1       | <i>F. excelsior</i>                      | Orléans_31 | 1.39                | G2       | 22/03/2015       | 1          |
| R                | <i>F. excelsior</i> | Orléans               | Orléans_46 | 4.30                | G1       | <i>F. excelsior</i>                      | Orléans_32 | 4,00                | G1       | 22/03/2015       | 0          |
| D+R              | <i>F. excelsior</i> | Orléans               | Orléans_46 | 4.30                | G1       | <i>F. excelsior</i>                      | Orléans_34 | 4.10                | G1       | 11/03/2015       | 0          |
| R                | <i>F. excelsior</i> | Orléans               | Orléans_46 | 4.30                | G1       | <i>F. excelsior</i>                      | Orléans_35 | 2.53                | G2       | 11/03/2015       | 1          |
| D+R              | <i>F. excelsior</i> | Orléans               | Orléans_46 | 4.30                | G1       | <i>F. excelsior</i>                      | Orléans_41 | 4.79                | G1       | 22/03/2015       | 0          |
| R                | <i>F. excelsior</i> | Orléans               | Orléans_46 | 4.30                | G1       | <i>F. excelsior</i>                      | Orléans_42 | 1.82                | G2       | 22/03/2015       | 1          |
| S                | <i>F. excelsior</i> | Orléans               | Orléans_46 | 4.30                | G1       | <i>F. excelsior</i>                      | Orléans_46 | 4.30                | G1       | 22/03/2015       | 0          |

**Table S3.** List of the 88 referenced tested genotypes (27 in the Orléans collection, and 61 in the Cévennes populations (33 in Camprieu and 28 in Aures)). Each genotype was tested as pollen recipient (R) or as pollen donor (D) for compatibility with G1 and G2 testers: 0 indicates that incompatibility was observed, 1 indicates compatibility was observed. (S): the genotype was tested for self-incompatibility; H: hermaphrodite; M: male. Each tree was assigned to G1 or G2 SI group.

| Tested genotypes |                     |                    |              |                  |          | Genotypes used as testers in stigma test |             |                  |          | Stigma test      |            |
|------------------|---------------------|--------------------|--------------|------------------|----------|------------------------------------------|-------------|------------------|----------|------------------|------------|
| Tested as        | Species             | Collection/O rigin | Label        | Sexual phenotype | SI group | Species                                  | Label       | Sexual phenotype | SI group | Date of the test | Conclusion |
| R                | <i>F. excelsior</i> | Orléans            | Orléans_46   | 4.30             | G1       | <i>P. angustifolia</i>                   | Pa_03.15_41 | H                | G1       | 11/03/2015       | 0          |
| R                | <i>F. excelsior</i> | Orléans            | Orléans_46   | 4.30             | G1       | <i>P. angustifolia</i>                   | Pa_03.15_37 | H                | G2       | 11/03/2015       | 1          |
| R                | <i>F. excelsior</i> | Orléans            | Orléans_46   | 4.30             | G1       | <i>P. angustifolia</i>                   | Pa_07.E_50  | M                | M        | 11/03/2015       | 1          |
| D                | <i>F. excelsior</i> | Camprieu           | Cevennes_001 | 1                | G2       | <i>P. angustifolia</i>                   | Pa_07.E_42  | H                | G1       | 03/03/2016       | 1          |
| D                | <i>F. excelsior</i> | Camprieu           | Cevennes_001 | 1                | G2       | <i>P. angustifolia</i>                   | Pa_01.N_25  | H                | G2       | 03/03/2016       | 0          |
| D                | <i>F. excelsior</i> | Camprieu           | Cevennes_005 | 1                | G2       | <i>P. angustifolia</i>                   | Pa_07.E_42  | H                | G1       | 03/03/2016       | 1          |
| D                | <i>F. excelsior</i> | Camprieu           | Cevennes_005 | 1                | G2       | <i>P. angustifolia</i>                   | Pa_01.N_25  | H                | G2       | 03/03/2016       | 0          |
| D                | <i>F. excelsior</i> | Camprieu           | Cevennes_009 | 1.5              | G2       | <i>P. angustifolia</i>                   | Pa_07.E_42  | H                | G1       | 03/03/2016       | 1          |
| D                | <i>F. excelsior</i> | Camprieu           | Cevennes_009 | 1.5              | G2       | <i>P. angustifolia</i>                   | Pa_01.N_25  | H                | G2       | 03/03/2016       | 0          |
| R                | <i>F. excelsior</i> | Camprieu           | Cevennes_011 | 6                | G1       | <i>P. angustifolia</i>                   | Pa_07.E_42  | H                | G1       | 02/03/2016       | 0          |
| R                | <i>F. excelsior</i> | Camprieu           | Cevennes_011 | 6                | G1       | <i>P. angustifolia</i>                   | Pa_01.N_07  | H                | G2       | 02/03/2016       | 1          |
| D                | <i>F. excelsior</i> | Camprieu           | Cevennes_014 | 1                | G2       | <i>P. angustifolia</i>                   | Pa_07.E_42  | H                | G1       | 03/03/2016       | 1          |
| D                | <i>F. excelsior</i> | Camprieu           | Cevennes_014 | 1                | G2       | <i>P. angustifolia</i>                   | Pa_01.N_25  | H                | G2       | 03/03/2016       | 0          |
| D                | <i>F. excelsior</i> | Camprieu           | Cevennes_017 | 2.5              | G2       | <i>P. angustifolia</i>                   | Pa_07.E_42  | H                | G1       | 03/03/2016       | 1          |
| D                | <i>F. excelsior</i> | Camprieu           | Cevennes_017 | 2.5              | G2       | <i>P. angustifolia</i>                   | Pa_01.N_25  | H                | G2       | 03/03/2016       | 0          |
| R                | <i>F. excelsior</i> | Camprieu           | Cevennes_017 | 2.5              | G2       | <i>P. angustifolia</i>                   | Pa_07.E_42  | H                | G1       | 02/03/2016       | 1          |
| R                | <i>F. excelsior</i> | Camprieu           | Cevennes_017 | 2.5              | G2       | <i>P. angustifolia</i>                   | Pa_01.N_07  | H                | G2       | 02/03/2016       | 0          |
| D                | <i>F. excelsior</i> | Camprieu           | Cevennes_018 | 1                | G2       | <i>P. angustifolia</i>                   | Pa_07.E_42  | H                | G1       | 03/03/2016       | 1          |
| D                | <i>F. excelsior</i> | Camprieu           | Cevennes_018 | 1                | G2       | <i>P. angustifolia</i>                   | Pa_01.N_25  | H                | G2       | 03/03/2016       | 0          |
| D                | <i>F. excelsior</i> | Camprieu           | Cevennes_020 | 1                | G2       | <i>P. angustifolia</i>                   | Pa_07.E_42  | H                | G1       | 03/03/2016       | 1          |
| D                | <i>F. excelsior</i> | Camprieu           | Cevennes_020 | 1                | G2       | <i>P. angustifolia</i>                   | Pa_01.N_25  | H                | G2       | 03/03/2016       | 0          |
| D                | <i>F. excelsior</i> | Camprieu           | Cevennes_021 | 6                | G1       | <i>P. angustifolia</i>                   | Pa_07.E_42  | H                | G1       | 26/02/2016       | 0          |
| D                | <i>F. excelsior</i> | Camprieu           | Cevennes_021 | 6                | G1       | <i>P. angustifolia</i>                   | Pa_01.N_25  | H                | G2       | 26/02/2016       | 1          |
| D                | <i>F. excelsior</i> | Camprieu           | Cevennes_023 | 1                | G2       | <i>P. angustifolia</i>                   | Pa_07.E_42  | H                | G1       | 03/03/2016       | 1          |
| D                | <i>F. excelsior</i> | Camprieu           | Cevennes_023 | 1                | G2       | <i>P. angustifolia</i>                   | Pa_01.N_25  | H                | G2       | 03/03/2016       | 0          |
| D                | <i>F. excelsior</i> | Camprieu           | Cevennes_025 | 1                | G2       | <i>P. angustifolia</i>                   | Pa_07.E_42  | H                | G1       | 03/03/2016       | 1          |
| D                | <i>F. excelsior</i> | Camprieu           | Cevennes_025 | 1                | G2       | <i>P. angustifolia</i>                   | Pa_01.N_25  | H                | G2       | 03/03/2016       | 0          |
| D                | <i>F. excelsior</i> | Camprieu           | Cevennes_027 | 4                | G1       | <i>P. angustifolia</i>                   | Pa_07.E_42  | H                | G1       | 03/03/2016       | 0          |



**Table S3.** List of the 88 referenced tested genotypes (27 in the Orléans collection, and 61 in the Cévennes populations (33 in Camprieu and 28 in Aures)). Each genotype was tested as pollen recipient (R) or as pollen donor (D) for compatibility with G1 and G2 testers: 0 indicates that incompatibility was observed, 1 indicates compatibility was observed. (S): the genotype was tested for self-incompatibility; H: hermaphrodite; M: male. Each tree was assigned to G1 or G2 SI group.

| Tested genotypes |                     |                    |              |                  |          | Genotypes used as testers in stigma test |            |                  |          | Stigma test      |            |
|------------------|---------------------|--------------------|--------------|------------------|----------|------------------------------------------|------------|------------------|----------|------------------|------------|
| Tested as        | Species             | Collection/O rigin | Label        | Sexual phenotype | SI group | Species                                  | Label      | Sexual phenotype | SI group | Date of the test | Conclusion |
| D                | <i>F. excelsior</i> | Camprieu           | Cevennes_027 | 4                | G1       | <i>P. angustifolia</i>                   | Pa_01.N_25 | H                | G2       | 03/03/2016       | 1          |
| D                | <i>F. excelsior</i> | Camprieu           | Cevennes_028 | 1                | G2       | <i>P. angustifolia</i>                   | Pa_07.E_42 | H                | G1       | 03/03/2016       | 1          |
| D                | <i>F. excelsior</i> | Camprieu           | Cevennes_028 | 1                | G2       | <i>P. angustifolia</i>                   | Pa_01.N_25 | H                | G2       | 03/03/2016       | 0          |
| D                | <i>F. excelsior</i> | Camprieu           | Cevennes_030 | 1.5              | G2       | <i>P. angustifolia</i>                   | Pa_07.E_42 | H                | G1       | 03/03/2016       | 1          |
| D                | <i>F. excelsior</i> | Camprieu           | Cevennes_030 | 1.5              | G2       | <i>P. angustifolia</i>                   | Pa_01.N_25 | H                | G2       | 03/03/2016       | 0          |
| D                | <i>F. excelsior</i> | Camprieu           | Cevennes_033 | 2                | G2       | <i>P. angustifolia</i>                   | Pa_07.E_42 | H                | G1       | 03/03/2016       | 1          |
| D                | <i>F. excelsior</i> | Camprieu           | Cevennes_033 | 2                | G2       | <i>P. angustifolia</i>                   | Pa_01.N_25 | H                | G2       | 03/03/2016       | 0          |
| D                | <i>F. excelsior</i> | Camprieu           | Cevennes_041 | 1                | G2       | <i>P. angustifolia</i>                   | Pa_07.E_42 | H                | G1       | 03/03/2016       | 1          |
| D                | <i>F. excelsior</i> | Camprieu           | Cevennes_041 | 1                | G2       | <i>P. angustifolia</i>                   | Pa_01.N_25 | H                | G2       | 03/03/2016       | 0          |
| D                | <i>F. excelsior</i> | Camprieu           | Cevennes_042 | 1                | G2       | <i>P. angustifolia</i>                   | Pa_07.E_42 | H                | G1       | 03/03/2016       | 1          |
| D                | <i>F. excelsior</i> | Camprieu           | Cevennes_042 | 1                | G2       | <i>P. angustifolia</i>                   | Pa_01.N_25 | H                | G2       | 03/03/2016       | 0          |
| D                | <i>F. excelsior</i> | Camprieu           | Cevennes_043 | 1                | G2       | <i>P. angustifolia</i>                   | Pa_07.E_42 | H                | G1       | 03/03/2016       | 1          |
| D                | <i>F. excelsior</i> | Camprieu           | Cevennes_043 | 1                | G2       | <i>P. angustifolia</i>                   | Pa_01.N_25 | H                | G2       | 03/03/2016       | 0          |
| D                | <i>F. excelsior</i> | Camprieu           | Cevennes_046 | 1                | G2       | <i>P. angustifolia</i>                   | Pa_07.E_42 | H                | G1       | 03/03/2016       | 1          |
| D                | <i>F. excelsior</i> | Camprieu           | Cevennes_046 | 1                | G2       | <i>P. angustifolia</i>                   | Pa_01.N_25 | H                | G2       | 03/03/2016       | 0          |
| D                | <i>F. excelsior</i> | Camprieu           | Cevennes_048 | 1                | G2       | <i>P. angustifolia</i>                   | Pa_07.E_42 | H                | G1       | 03/03/2016       | 1          |
| D                | <i>F. excelsior</i> | Camprieu           | Cevennes_048 | 1                | G2       | <i>P. angustifolia</i>                   | Pa_01.N_25 | H                | G2       | 03/03/2016       | 0          |
| D                | <i>F. excelsior</i> | Camprieu           | Cevennes_051 | 1.5              | G2       | <i>P. angustifolia</i>                   | Pa_07.E_42 | H                | G1       | 03/03/2016       | 1          |
| D                | <i>F. excelsior</i> | Camprieu           | Cevennes_051 | 1.5              | G2       | <i>P. angustifolia</i>                   | Pa_01.N_25 | H                | G2       | 03/03/2016       | 0          |
| D                | <i>F. excelsior</i> | Camprieu           | Cevennes_055 | 1                | G2       | <i>P. angustifolia</i>                   | Pa_07.E_42 | H                | G1       | 03/03/2016       | 1          |
| D                | <i>F. excelsior</i> | Camprieu           | Cevennes_055 | 1                | G2       | <i>P. angustifolia</i>                   | Pa_01.N_25 | H                | G2       | 03/03/2016       | 0          |
| R                | <i>F. excelsior</i> | Camprieu           | Cevennes_061 | 5                | G1       | <i>P. angustifolia</i>                   | Pa_07.E_42 | H                | G1       | 29/03/2016       | 0          |
| R                | <i>F. excelsior</i> | Camprieu           | Cevennes_061 | 5                | G1       | <i>P. angustifolia</i>                   | Pa_01.N_07 | H                | G2       | 30/03/2016       | 1          |
| D                | <i>F. excelsior</i> | Camprieu           | Cevennes_062 | 1                | G2       | <i>P. angustifolia</i>                   | Pa_07.E_42 | H                | G1       | 03/03/2016       | 1          |
| D                | <i>F. excelsior</i> | Camprieu           | Cevennes_062 | 1                | G2       | <i>P. angustifolia</i>                   | Pa_01.N_25 | H                | G2       | 03/03/2016       | 0          |
| D                | <i>F. excelsior</i> | Camprieu           | Cevennes_063 | 1.5              | G1       | <i>P. angustifolia</i>                   | Pa_01.N_25 | H                | G2       | 03/03/2016       | 0          |
| D                | <i>F. excelsior</i> | Camprieu           | Cevennes_063 | 1.5              | G1       | <i>P. angustifolia</i>                   | Pa_01.N_25 | H                | G2       | 03/03/2016       | 1          |
| D                | <i>F. excelsior</i> | Camprieu           | Cevennes_064 | 1.5              | G2       | <i>P. angustifolia</i>                   | Pa_07.E_42 | H                | G1       | 03/03/2016       | 1          |

**Table S3.** List of the 88 referenced tested genotypes (27 in the Orléans collection, and 61 in the Cévennes populations (33 in Camprieu and 28 in Aures)). Each genotype was tested as pollen recipient (R) or as pollen donor (D) for compatibility with G1 and G2 testers: 0 indicates that incompatibility was observed, 1 indicates compatibility was observed. (S): the genotype was tested for self-incompatibility; H: hermaphrodite; M: male. Each tree was assigned to G1 or G2 SI group.

| Tested genotypes |                     |                    |              |                  |          | Genotypes used as testers in stigma test |            |                  |          | Stigma test      |            |
|------------------|---------------------|--------------------|--------------|------------------|----------|------------------------------------------|------------|------------------|----------|------------------|------------|
| Tested as        | Species             | Collection/O rigin | Label        | Sexual phenotype | SI group | Species                                  | Label      | Sexual phenotype | SI group | Date of the test | Conclusion |
| D                | <i>F. excelsior</i> | Camprieu           | Cevennes_064 | 1.5              | G2       | <i>P. angustifolia</i>                   | Pa_01.N_25 | H                | G2       | 03/03/2016       | 0          |
| D                | <i>F. excelsior</i> | Camprieu           | Cevennes_070 | 1                | G2       | <i>P. angustifolia</i>                   | Pa_07.E_42 | H                | G1       | 03/03/2016       | 1          |
| D                | <i>F. excelsior</i> | Camprieu           | Cevennes_070 | 1                | G2       | <i>P. angustifolia</i>                   | Pa_01.N_25 | H                | G2       | 03/03/2016       | 0          |
| D                | <i>F. excelsior</i> | Camprieu           | Cevennes_071 | 1                | G2       | <i>P. angustifolia</i>                   | Pa_07.E_42 | H                | G1       | 03/03/2016       | 1          |
| D                | <i>F. excelsior</i> | Camprieu           | Cevennes_071 | 1                | G2       | <i>P. angustifolia</i>                   | Pa_01.N_25 | H                | G2       | 03/03/2016       | 0          |
| D                | <i>F. excelsior</i> | Camprieu           | Cevennes_073 | 1                | G2       | <i>P. angustifolia</i>                   | Pa_07.E_42 | H                | G1       | 03/03/2016       | 1          |
| D                | <i>F. excelsior</i> | Camprieu           | Cevennes_073 | 1                | G2       | <i>P. angustifolia</i>                   | Pa_01.N_25 | H                | G2       | 03/03/2016       | 0          |
| R                | <i>F. excelsior</i> | Camprieu           | Cevennes_074 | 4.5              | G1       | <i>P. angustifolia</i>                   | Pa_07.E_42 | H                | G1       | 29/03/2016       | 0          |
| R                | <i>F. excelsior</i> | Camprieu           | Cevennes_074 | 4.5              | G1       | <i>P. angustifolia</i>                   | Pa_01.N_07 | H                | G2       | 30/03/2016       | 1          |
| D                | <i>F. excelsior</i> | Camprieu           | Cevennes_076 | 2                | G2       | <i>P. angustifolia</i>                   | Pa_07.E_42 | H                | G1       | 03/03/2016       | 1          |
| D                | <i>F. excelsior</i> | Camprieu           | Cevennes_076 | 2                | G2       | <i>P. angustifolia</i>                   | Pa_01.N_25 | H                | G2       | 03/03/2016       | 0          |
| R                | <i>F. excelsior</i> | Camprieu           | Cevennes_078 | 5.5              | G1       | <i>P. angustifolia</i>                   | Pa_07.E_42 | H                | G1       | 02/03/2016       | 0          |
| R                | <i>F. excelsior</i> | Camprieu           | Cevennes_078 | 5.5              | G1       | <i>P. angustifolia</i>                   | Pa_01.N_25 | H                | G2       | 02/03/2016       | 1          |
| D                | <i>F. excelsior</i> | Camprieu           | Cevennes_086 | 2                | G2       | <i>P. angustifolia</i>                   | Pa_07.E_42 | H                | G1       | 03/03/2016       | 1          |
| D                | <i>F. excelsior</i> | Camprieu           | Cevennes_086 | 2                | G2       | <i>P. angustifolia</i>                   | Pa_01.N_25 | H                | G2       | 03/03/2016       | 0          |
| R                | <i>F. excelsior</i> | Aures              | Cevennes_093 | 5                | G1       | <i>P. angustifolia</i>                   | Pa_07.E_42 | H                | G1       | 02/03/2016       | 0          |
| R                | <i>F. excelsior</i> | Aures              | Cevennes_093 | 5                | G1       | <i>P. angustifolia</i>                   | Pa_01.N_25 | H                | G2       | 02/03/2016       | 1          |
| D                | <i>F. excelsior</i> | Aures              | Cevennes_095 | 2                | G2       | <i>P. angustifolia</i>                   | Pa_07.E_42 | H                | G1       | 03/03/2016       | 1          |
| D                | <i>F. excelsior</i> | Aures              | Cevennes_095 | 2                | G2       | <i>P. angustifolia</i>                   | Pa_01.N_25 | H                | G2       | 03/03/2016       | 0          |
| D                | <i>F. excelsior</i> | Aures              | Cevennes_096 | 1                | G2       | <i>P. angustifolia</i>                   | Pa_07.E_42 | H                | G1       | 03/03/2016       | 1          |
| D                | <i>F. excelsior</i> | Aures              | Cevennes_096 | 1                | G2       | <i>P. angustifolia</i>                   | Pa_01.N_25 | H                | G2       | 03/03/2016       | 0          |
| D                | <i>F. excelsior</i> | Aures              | Cevennes_097 | 2.5              | G2       | <i>P. angustifolia</i>                   | Pa_07.E_42 | H                | G1       | 03/03/2016       | 1          |
| D                | <i>F. excelsior</i> | Aures              | Cevennes_097 | 2.5              | G2       | <i>P. angustifolia</i>                   | Pa_01.N_25 | H                | G2       | 03/03/2016       | 0          |
| R                | <i>F. excelsior</i> | Aures              | Cevennes_098 | 4                | G1       | <i>P. angustifolia</i>                   | Pa_07.E_42 | H                | G1       | 02/03/2016       | 0          |
| R                | <i>F. excelsior</i> | Aures              | Cevennes_098 | 4                | G1       | <i>P. angustifolia</i>                   | Pa_01.N_25 | H                | G2       | 02/03/2016       | 1          |
| R                | <i>F. excelsior</i> | Aures              | Cevennes_099 | 5                | G1       | <i>P. angustifolia</i>                   | Pa_07.E_42 | H                | G1       | 02/03/2016       | 0          |
| R                | <i>F. excelsior</i> | Aures              | Cevennes_099 | 5                | G1       | <i>P. angustifolia</i>                   | Pa_01.N_25 | H                | G2       | 02/03/2016       | 1          |
| D                | <i>F. excelsior</i> | Aures              | Cevennes_101 | 2                | G2       | <i>P. angustifolia</i>                   | Pa_07.E_42 | H                | G1       | 03/03/2016       | 1          |

**Table S3.** List of the 88 referenced tested genotypes (27 in the Orléans collection, and 61 in the Cévennes populations (33 in Camprieu and 28 in Aures)). Each genotype was tested as pollen recipient (R) or as pollen donor (D) for compatibility with G1 and G2 testers: 0 indicates that incompatibility was observed, 1 indicates compatibility was observed. (S): the genotype was tested for self-incompatibility; H: hermaphrodite; M: male. Each tree was assigned to G1 or G2 SI group.

| Tested genotypes |                     |                    |              |                  |          | Genotypes used as testers in stigma test |            |                  |          | Stigma test      |            |
|------------------|---------------------|--------------------|--------------|------------------|----------|------------------------------------------|------------|------------------|----------|------------------|------------|
| Tested as        | Species             | Collection/O rigin | Label        | Sexual phenotype | SI group | Species                                  | Label      | Sexual phenotype | SI group | Date of the test | Conclusion |
| D                | <i>F. excelsior</i> | Aures              | Cevennes_101 | 2                | G2       | <i>P. angustifolia</i>                   | Pa_01.N_25 | H                | G2       | 03/03/2016       | 0          |
| R                | <i>F. excelsior</i> | Aures              | Cevennes_110 | 6                | G1       | <i>P. angustifolia</i>                   | Pa_07.E_42 | H                | G1       | 02/03/2016       | 0          |
| R                | <i>F. excelsior</i> | Aures              | Cevennes_110 | 6                | G1       | <i>P. angustifolia</i>                   | Pa_01.N_25 | H                | G2       | 02/03/2016       | 1          |
| D                | <i>F. excelsior</i> | Aures              | Cevennes_111 | 1                | G2       | <i>P. angustifolia</i>                   | Pa_07.E_42 | H                | G1       | 03/03/2016       | 1          |
| D                | <i>F. excelsior</i> | Aures              | Cevennes_111 | 1                | G2       | <i>P. angustifolia</i>                   | Pa_01.N_25 | H                | G2       | 03/03/2016       | 0          |
| R                | <i>F. excelsior</i> | Aures              | Cevennes_112 | 5                | G1       | <i>P. angustifolia</i>                   | Pa_07.E_42 | H                | G1       | 02/03/2016       | 0          |
| R                | <i>F. excelsior</i> | Aures              | Cevennes_112 | 5                | G1       | <i>P. angustifolia</i>                   | Pa_01.N_25 | H                | G2       | 02/03/2016       | 1          |
| D                | <i>F. excelsior</i> | Aures              | Cevennes_113 | 1.5              | G2       | <i>P. angustifolia</i>                   | Pa_07.E_42 | H                | G1       | 03/03/2016       | 1          |
| D                | <i>F. excelsior</i> | Aures              | Cevennes_113 | 1.5              | G2       | <i>P. angustifolia</i>                   | Pa_01.N_25 | H                | G2       | 03/03/2016       | 0          |
| R                | <i>F. excelsior</i> | Aures              | Cevennes_114 | 6.5              | G1       | <i>P. angustifolia</i>                   | Pa_07.E_42 | H                | G1       | 02/03/2016       | 0          |
| R                | <i>F. excelsior</i> | Aures              | Cevennes_114 | 6.5              | G1       | <i>P. angustifolia</i>                   | Pa_01.N_25 | H                | G2       | 02/03/2016       | 1          |
| D                | <i>F. excelsior</i> | Aures              | Cevennes_115 | 1                | G2       | <i>P. angustifolia</i>                   | Pa_07.E_42 | H                | G1       | 03/03/2016       | 1          |
| D                | <i>F. excelsior</i> | Aures              | Cevennes_115 | 1                | G2       | <i>P. angustifolia</i>                   | Pa_01.N_25 | H                | G2       | 03/03/2016       | 0          |
| R                | <i>F. excelsior</i> | Aures              | Cevennes_117 | 5                | G1       | <i>P. angustifolia</i>                   | Pa_07.E_42 | H                | G1       | 03/03/2016       | 0          |
| R                | <i>F. excelsior</i> | Aures              | Cevennes_117 | 5                | G1       | <i>P. angustifolia</i>                   | Pa_01.N_25 | H                | G2       | 03/03/2016       | 1          |
| D                | <i>F. excelsior</i> | Aures              | Cevennes_118 | 1                | G2       | <i>P. angustifolia</i>                   | Pa_07.E_42 | H                | G1       | 03/03/2016       | 1          |
| D                | <i>F. excelsior</i> | Aures              | Cevennes_118 | 1                | G2       | <i>P. angustifolia</i>                   | Pa_01.N_25 | H                | G2       | 03/03/2016       | 0          |
| D                | <i>F. excelsior</i> | Aures              | Cevennes_119 | 1                | G2       | <i>P. angustifolia</i>                   | Pa_07.E_42 | H                | G1       | 03/03/2016       | 1          |
| D                | <i>F. excelsior</i> | Aures              | Cevennes_119 | 1                | G2       | <i>P. angustifolia</i>                   | Pa_01.N_25 | H                | G2       | 03/03/2016       | 0          |
| D                | <i>F. excelsior</i> | Aures              | Cevennes_121 | 1                | G2       | <i>P. angustifolia</i>                   | Pa_07.E_42 | H                | G1       | 03/03/2016       | 1          |
| D                | <i>F. excelsior</i> | Aures              | Cevennes_121 | 1                | G2       | <i>P. angustifolia</i>                   | Pa_01.N_25 | H                | G2       | 03/03/2016       | 0          |
| D                | <i>F. excelsior</i> | Aures              | Cevennes_123 | 1                | G2       | <i>P. angustifolia</i>                   | Pa_07.E_42 | H                | G1       | 03/03/2016       | 1          |
| D                | <i>F. excelsior</i> | Aures              | Cevennes_123 | 1                | G2       | <i>P. angustifolia</i>                   | Pa_01.N_25 | H                | G2       | 03/03/2016       | 0          |
| D                | <i>F. excelsior</i> | Aures              | Cevennes_124 | 6                | G1       | <i>P. angustifolia</i>                   | Pa_07.E_42 | H                | G1       | 03/03/2016       | 1          |
| D                | <i>F. excelsior</i> | Aures              | Cevennes_124 | 6                | G1       | <i>P. angustifolia</i>                   | Pa_01.N_25 | H                | G2       | 03/03/2016       | 0          |
| D                | <i>F. excelsior</i> | Aures              | Cevennes_128 | 1.5              | G2       | <i>P. angustifolia</i>                   | Pa_07.E_42 | H                | G1       | 03/03/2016       | 1          |
| D                | <i>F. excelsior</i> | Aures              | Cevennes_128 | 1.5              | G2       | <i>P. angustifolia</i>                   | Pa_01.N_25 | H                | G2       | 03/03/2016       | 0          |
| R                | <i>F. excelsior</i> | Aures              | Cevennes_129 | 4                | G1       | <i>P. angustifolia</i>                   | Pa_07.E_42 | H                | G1       | 02/03/2016       | 0          |

**Table S3.** List of the 88 referenced tested genotypes (27 in the Orléans collection, and 61 in the Cévennes populations (33 in Camprieu and 28 in Aures)). Each genotype was tested as pollen recipient (R) or as pollen donor (D) for compatibility with G1 and G2 testers: 0 indicates that incompatibility was observed, 1 indicates compatibility was observed. (S): the genotype was tested for self-incompatibility; H: hermaphrodite; M: male. Each tree was assigned to G1 or G2 SI group.

| Tested genotypes |                     |                       |              |                     |          | Genotypes used as testers in stigma test |            |                     |          | Stigma test      |            |
|------------------|---------------------|-----------------------|--------------|---------------------|----------|------------------------------------------|------------|---------------------|----------|------------------|------------|
| Tested as        | Species             | Collection/O<br>rigin | Label        | Sexual<br>phenotype | SI group | Species                                  | Label      | Sexual<br>phenotype | SI group | Date of the test | Conclusion |
| R                | <i>F. excelsior</i> | Aures                 | Cevennes_129 | 4                   | G1       | <i>P.angustifolia</i>                    | Pa_01.N_25 | H                   | G2       | 02/03/2016       | 1          |
| D                | <i>F. excelsior</i> | Aures                 | Cevennes_131 | 2                   | G2       | <i>P.angustifolia</i>                    | Pa_07.E_42 | H                   | G1       | 03/03/2016       | 1          |
| D                | <i>F. excelsior</i> | Aures                 | Cevennes_131 | 2                   | G2       | <i>P.angustifolia</i>                    | Pa_01.N_25 | H                   | G2       | 03/03/2016       | 0          |
| D                | <i>F. excelsior</i> | Aures                 | Cevennes_132 | 2                   | G2       | <i>P.angustifolia</i>                    | Pa_07.E_42 | H                   | G1       | 03/03/2016       | 1          |
| D                | <i>F. excelsior</i> | Aures                 | Cevennes_132 | 2                   | G2       | <i>P.angustifolia</i>                    | Pa_01.N_25 | H                   | G2       | 03/03/2016       | 0          |
| R                | <i>F. excelsior</i> | Aures                 | Cevennes_133 | 3                   | G1       | <i>P.angustifolia</i>                    | Pa_07.E_42 | H                   | G1       | 02/03/2016       | 0          |
| R                | <i>F. excelsior</i> | Aures                 | Cevennes_133 | 3                   | G1       | <i>P.angustifolia</i>                    | Pa_01.N_25 | H                   | G2       | 02/03/2016       | 1          |
| D                | <i>F. excelsior</i> | Aures                 | Cevennes_134 | 4                   | G1       | <i>P.angustifolia</i>                    | Pa_07.E_42 | H                   | G1       | 03/03/2016       | 0          |
| D                | <i>F. excelsior</i> | Aures                 | Cevennes_134 | 4                   | G1       | <i>P.angustifolia</i>                    | Pa_01.N_25 | H                   | G2       | 03/03/2016       | 1          |
| D                | <i>F. excelsior</i> | Aures                 | Cevennes_135 | 3                   | G1       | <i>P.angustifolia</i>                    | Pa_07.E_42 | H                   | G1       | 29/03/2016       | 0          |
| D                | <i>F. excelsior</i> | Aures                 | Cevennes_135 | 3                   | G1       | <i>P.angustifolia</i>                    | Pa_01.N_07 | H                   | G2       | 30/03/2016       | 1          |
| D                | <i>F. excelsior</i> | Aures                 | Cevennes_137 | 3                   | G2       | <i>P.angustifolia</i>                    | Pa_07.E_42 | H                   | G1       | 03/03/2016       | 1          |
| D                | <i>F. excelsior</i> | Aures                 | Cevennes_137 | 3                   | G2       | <i>P.angustifolia</i>                    | Pa_01.N_25 | H                   | G2       | 03/03/2016       | 0          |
| R                | <i>F. excelsior</i> | Aures                 | Cevennes_139 | 4                   | G1       | <i>P.angustifolia</i>                    | Pa_07.E_42 | H                   | G1       | 02/03/2016       | 0          |
| R                | <i>F. excelsior</i> | Aures                 | Cevennes_139 | 4                   | G1       | <i>P.angustifolia</i>                    | Pa_01.N_25 | H                   | G2       | 02/03/2016       | 1          |
